# Supplementary material
Source: ML conference proceedings conference paper supplement (https://proceedings.neurips.cc/paper_files/paper/2022/hash/559726fdfb19005e368be4ce3d40e3e5-Abstract.html)
Supplement: Supplementary file 1 [file 559726fdfb19005e368be4ce3d40e3e5-Supplemental-Conference.zip]

Archive with 4 entries (4 files):
- paper_main_appendix.pdf
- __MACOSX/._paper_main_appendix.pdf
- paper_appendix.pdf
- __MACOSX/._paper_appendix.pdf
